# Supplementary material for: Dynamic root growth in response to depth-varying soil moisture availability: a rhizobox study
Source: Copernicus journal article supplement (doi:10.5194/egusphere-2022-104), 2022-04-27
Supplement: Supplementary file [file egusphere-2022-104-RC1-supplement.pdf]

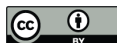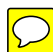

# Dynamic root growth in response to depth-varying soil moisture availability: a rhizobox study

Cynthia Maan<sup>1</sup>, Marie-Claire ten Veldhuis<sup>1</sup>, and Bas van de Wiel<sup>1</sup>

<sup>1</sup>Geoscience and Remote Sensing, Delft University of Technology, Stevinweg 1, 2628 CN Delft, The Netherlands

**Correspondence:** Cynthia Maan (dcmaan@gmail.com)

**Abstract.** Plant roots are highly adaptable, but their adaptability is not included in crop and land surface models. They rely on a simplified representation of root growth, independent of soil moisture availability. Data of subsurface processes and interactions, needed for model set-up and validation, are scarce. Here we investigated soil moisture driven root growth. To this end we installed subsurface drip lines and small soil moisture sensors (0.2 L measurement volume) inside rhizoboxes (length x width x height, 45 x 10 x 45cm). The development of the vertical soil moisture and root growth profiles are tracked with a high spatial and temporal resolution. The results confirm that root growth is predominantly driven by vertical soil moisture distribution, while influencing soil moisture at the same time. Besides support for the functional relationship between the soil moisture and the root density growth rate, the experiments suggest that vertical root extension only takes place if the soil moisture exceeds a threshold value at the root tip. We show that even a parsimonious one-dimensional water balance model, driven by the measured water input and output fluxes, can be convincingly improved by implementing root growth driven by soil moisture availability.

## 1 Introduction

Droughts will become more severe and last longer, resulting in increasing (water) stress on plants. However, their dynamic growth provides the plants with a strong ability to adapt and develop resilience to droughts and climate change (Engels et al., 1994; Gao et al., 2014). Especially the flexibility of the root system can be crucial for the plants resilience to droughts and their natural adaptation strategies (King et al., 2003; Ristova and Barbez, 2018; Wasaya et al., 2018; Zhang et al., 2019). However, the flexibility of plant roots, and their ability to adapt to the environment, is badly included in crop and land surface models (Warren et al., 2015). At the same time, climate and ecosystem models poorly represent the fluxes of water and heat to the atmosphere (Giard and Bazile, 2000), are sensitive to the chosen vertical root distribution profiles (Feddes et al., 2001), and commonly underestimate the impact of the rooting depth on climate and climate change (He et al., 2004; van Dam et al., 2011; Warren et al., 2015).

In most crop and land surface models, the vertical root distribution is simply parameterized as an exponentially decaying function with soil depth (Feddes and Rijtema, 1972; Gerwitz and Page, 1974; Jackson et al., 1996; Kroes et al., 2009), while the maximum rooting depth is described by a linearly increasing function with time (Kroes et al., 2009), i.e. both independently of soil moisture. However, many studies indicate that in reality parameters as root length, penetration depth and depletion rate

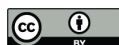

at depth are dominantly influenced by soil moisture (Barber et al., 1988; Coifman et al., 2005; Zhang et al., 2019), and that deviating functions and trends are commonly found in nature (Fan et al., 2017).

For instance: For maize and rape plants it was found that the plants respond rapidly to drying and re-wetting the topsoil by locally increasing root growth in soil layers with the most favourable conditions (Engels et al., 1994). The same study suggests that the plasticity in root growth contributes to the maintenance of an adequate nutritional status (Engels et al., 1994). For cotton, Klepper et al. (1973) were able to stimulate a maximum root length density deeper in the soil by altering irrigation schedules. For wheat plants, King et al. (2003) noted that greater density of fine roots at depth increases yields through access to additional resources. Deeper roots lead to higher resilience to subsequent droughts, by increasing the root zone and water accessibility (King et al., 2003).

Models for dynamical root growth have been proposed by Adiku et al. (1996) and Schymanski et al. (2008). Both models allow for enhanced root density growth in areas where soil water is more easily available. The model of Adiku et al. (1996) furthermore includes a proportional dependency of the root growth on the local root length density, while the bulk root growth is linked to the bulk biomass growth (Adiku et al., 1996). The model was (only) qualitatively validated against root density measurements for two different scenarios: (1) for vertically homogeneous and non-limiting soil water conditions, in which case the model reproduced an exponential decline in root length density with increasing soil depth; and (2) for limiting soil water conditions with downward increasing water content, in which case the patterns of the simulated and observed root growth deviated from a simple exponential function, with more roots in the lower parts of the soil profile.

In the model of Schymanski et al. (2008), the bulk root density growth depends on the difference between the plants water demand and the actual water uptake: growth of the root bulk in case of water shortage and decay of the root bulk in case of water abundance. The distributions in the vertical are related to the soil moisture profiles. The model was validated against evapotranspiration data and soil moisture at 10 cm depth.

Neither of the dynamic root growth models have been implemented in crop models and land surface models so far. Such an implementation in coupled models would be important for developing a better understanding of the coupled action of plant roots and the subsurface environment, which could for example lead to the development of methods for system manipulation and boosting the plants climate resilience.

To investigate the dominance of soil moisture driven root growth, we test a similar -but more parsimonious- root system model. The model is parameterized and validated based on data from our experimental set-up. We use a similar root distribution function as Schymanski et al. (2008), but neglect the possible influence of the plants water demand (or biomass growth rate) on the bulk root growth; note that the existing models are not unambiguous about the latter. To apply our experimental set-up for model calibration and validation, we simulate a single soil-plant system. Thereby, a direct comparison with the experimental data is possible, and the model can be validated against both, measurements of the water balance components and root growth rates. Our model is characterized by simplicity; the number of calibration parameters is limited, and the water balance model only requires the irrigation and (potential) evapotranspiration flux as system drivers, similar to Schymanski et al. (2008).

In the next chapter, we describe our experiments and model formulation. In Section 2.1, the experimental set-up is discussed. The results are used to define a diagnostic equation between root growth and soil moisture in section 2.2. Secondly, we combine

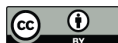

the diagnostic equation with the Richard's equation to link the variables to independent system drivers, in Section 2.3 and 2.4. In Chapter 3 conclusions are presented.

## 2 Experiments

### 2.1 Experimental Set-up

65 We study 50 days of evolution of maize soil-root systems inside a rhizobox (with a length x width x height of 45 x 10 x 45cm, respectively), Figure 1. Irrigation is supplied continuously at a low flow rate through porous drip lines that were installed at five different levels (with 10cm intervals). The flow rate is constant throughout the day, but adjusted in steps to follow the plants growth and demand for water (see dashed curve in Figure 2A). The irrigation depth is increased in steps. At the bottom, a drainage reservoir was installed. The top soil was covered with plastic to prevent evaporation from the soil. The rhizobox was filled with sand-potting soil mix (weight ratio 2.7:1). The soil moisture is measured continuously at four depths inside the rhizobox, while the root density growth is tracked daily through the transparent window. The set-up was placed on a 1g precision scale to track the overall water balance. It should be noted, however, that the total time series of the system mass, as plotted in Figure 2A, was subjected to multiple extrapolations from shorter time series (with time spans of hours to days), to deal with (daily) interruptions due to measurements. Furthermore, the (increase of the) plants mass was neglected; the overall biomass growth during the whole period was about 100 gram, which is small compared with the total irrigation and evapotranspiration fluxes. At  $t = 0$ , a maize plant with a maximum root length of 5cm and an above ground height of 10 – 15cm was placed inside the rhizobox.

### 2.2 Diagnostic model of root growth: root follows moisture

#### Time series and correlations

80 The soil moisture development is plotted together with profiles of the soil moisture and root density growth within succeeding periods in figure 2C. Root development is found to be most pronounced at depth intervals with highest soil moisture. These results suggest that soil moisture and root growth distributions are strongly connected.

#### Model formulation

We test the following diagnostic equation to model the root growth rate distributed as function of the (normalized) soil moisture:

85 
$$\frac{\partial R}{\partial t} \frac{1}{r} = \frac{\theta_n}{\int_L^0 \theta_n}, \quad (1)$$

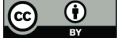

Where  $R(z, t)$  ( $cm/cm^3$ ) is the root density profile,  $\theta_n$  is the normalized water content

$$\theta_n = \frac{\theta - \theta_r}{\theta_s - \theta_r}, \quad (2)$$

with  $\theta_s$  the saturated water content and  $\theta_r$  the **welting point**.

$r(t)$  in equation 1 is the depth integrated root growth:

$$90 \quad r = \int_L^0 \frac{\partial R}{\partial t} dz, \quad (3)$$

with  $L(t)$  ( $cm$ ) the vertical root extension, for which **a constant growth rate is taken**:

$$\frac{\partial L}{\partial t} = u_1 \quad (4)$$

Hence, equation 1 links the local root growth tendency, normalized with the bulk growth tendency, to the local soil moisture, also normalized with the bulk soil moisture.

## 95 **Model calibration and results**

Modeled root growth profiles are compared with the experimental data for successive time periods, see Figure 3A-E. Note that the two dimensional root length density observed at the window (in  $cm/cm^2$ ) is used as a direct proxy for the actual root length density  $R(z, t)$  ( $cm/cm^3$ ). **By default, for the results in Figure 3,  $u_1$  is taken as  $u_1 = 5cm/day$ .** In Figure 4 the sensitivity to this parameter is investigated. Patterns of root growth are represented fairly well (Figure 3), with the exception  
100 of the sharp local peak that occurs within the time slot 40 – 50 days (at  $z = -30$ ). This latter case is improved by adopting an extra condition for root growth: a threshold requirement is taken at the root tip, i.e. no vertical extension growth takes place if the soil moisture at the root tip is lower than  $\theta_n = 0.075$  (see Figure 3 F-J).

### **2.3 Soil moisture and water uptake model**

#### **Model formulation**

105 To calculate the evolution of the water content ( $\theta$ ) due to irrigation, soil water flow and plant water uptake, we apply Richards equation:

$$\frac{\partial \theta}{\partial t} = \frac{\partial q}{\partial z} - S + I \quad (5)$$

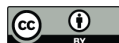

with  $S$  ( $cm^3/cm^3/min$ ) the soil water extraction by plant roots,  $I$  ( $cm^3/cm^3/min$ ) the irrigation,  $z$  ( $cm$ ) the vertical coordinate, taken positively upward, and  $q$  ( $cm/min$ ) the soil water flux density (positive upward).  $q$  is given by Darcy's equation:

$$q = K(h) \frac{\partial(h+z)}{\partial z}, \quad (6)$$

with  $K$  ( $cm/min$ ) the hydraulic conductivity and  $h$  ( $cm$ ) the soil water pressure head. Following (Clapp and Hornberger, 1978),  $h$  is taken as;

$$h = h_s \frac{\theta^{-b}}{\theta_s} \quad (7)$$

and  $K$  is taken as;

$$K = K_s \frac{\theta^{2b+3}}{\theta_s} \quad (8)$$

with  $h_s$  and  $k_s$  respectively the soil water pressure head ( $cm$ ) and conductivity at saturation,  $\theta_s$  the saturated water content and  $b$  an empirical exponent. The values of  $k_s$ ,  $\theta_s$  and  $b$  are taken from Clapp and Hornberger (1978), and correspond to loamy sand.

Following Adiku et al. (1996), the soil water extraction  $S$  is calculated by:

$$S = u_2 R \theta_n \quad (9)$$

Where  $u_2$  is the water extraction rate *per centimeter of roots* in ideal conditions ( $ml/cm/min$  or  $cm^3/cm/min$ ),  $S$  the actual soil water extraction by plant roots per soil volume per minute ( $ml/cm^3/min$ ), and  $R(z,t)$  is the root length density, i.e. roots per soil volume ( $cm/cm^3$ ).

## 125 Model calibration

$u_2$  is determined by comparing the soil moisture data with soil moisture simulations driven by the root profile measurements. The sensitivity to a range of tested variations are indicated in Figure 5. By default, for optimum results in Figure 6, different values were used for the subsequent periods:  $1.8 \cdot 10^{-2} ml/cm/hr$ ,  $1.2 \cdot 10^{-2} ml/cm/hr$ ,  $0.9 \cdot 10^{-2} ml/cm/hr$  and  $1.8 \cdot 10^{-2} ml/cm/hr$  for the time slots in panels A-D in Figure 6 respectively.

## 130 Results and discussion

Soil moisture and water uptake simulations were performed for the following settings for the root density profiles: (1) for the measured root profiles, (2) for the calculated root profiles, and (3) for exponential equivalents (most roots in the upper soil), all



with identical (measured) overall root growth rates. Results are indicated in Figure 6. The first 10 days were omitted because of the lack of observable root growth; it takes a couple of days before the roots can be observed at the window.

135 The results indicate that the soil moisture profiles and water uptake profiles derived from the modeled root profiles correspond fairly well with the results obtained from the measured root profiles (comparison solid and dashed lines in Figure 6), whereas the results derived from the exponentially shaped profiles show larger deviations, especially for the periods 30-40 days and 40-50 days.

140 Furthermore, the simulations driven by the measured and modeled root profiles correspond better with the measured total uptake rates compared to the simulations driven with the exponentially shaped root profiles, except for the first period in Figure 6 (10-20 days).

145 However, the differences between the modeled water components are relatively small, compared with the big differences in the root profiles. Even with the less realistic exponential root profile, rather similar soil moisture profile shapes are found (Figure 6). In each panel, the local peaks in the soil moisture coincide with the depths of irrigation. Smaller local root densities at these depths correspond with higher and wider soil moisture peaks (compare the dashed and dotted profiles in Figure 6), which can simply be explained by the smaller local uptake rates. Note that wider peaks result in a larger area in which uptake by plant roots can occur. Hence, this positive effect on the water uptake rates implies a negative (regulating) feedback loop between these components of the water balance, which keeps the differences limited.

150 In spite of the obvious differences, the limited impact of the root density distribution on the water components, together with the big changeability and limited predictability of a standard outside environment, might raise the question whether it is beneficial for the plant to invest in roots at times when the plant experiences drought, as assumed by Schymanski et al. (2008). The smaller the effects of the investment are, the more beneficial it will be for the plant to only invest during periods of abundant resources (as is assumed in most crop and land surface models via a linear dependency of the root growth on the overall biomass growth).

## 155 2.4 A prognostic model for coupled soil moisture and root growth

### Model formulation

Soil moisture and root growth are interacting variables. To *prognostically* simulate the time evolution of both variables, we implement the following equation for root density growth in the model described in Section 2.3:

$$\frac{\partial R}{\partial t} = u_3 \theta_n. \quad (10)$$

160 Hence, the local root growth tendency is now normalized by the (static) root density growth in optimal conditions (saturation)  $u_3$  ( $cm/cm^3/min$ ), instead of by the (measurable) bulk root growth tendency in Equation 1. Equation 10 differs from the formulation proposed by Adiku et al. (1996), which includes a proportional dependency of the root growth on the local root length density. The simulations with the exponential equivalent are performed in a similar fashion: After each update of the



165 root density profile, the exponential equivalent (with identical overall root length) is calculated and used for calculating the plant water uptake. The model is driven by irrigation data and the estimated overall evapotranspiration fluxes.

### Model calibration

$u_3$  is estimated by comparing the simulated root profiles with the data. The sensitivity to the tested variations are indicated in Figure 7. By default, for the results in Figure 8,  $u_3$  is taken as  $u_3 = 0.2\text{cm}/\text{cm}^3/\text{day}$ .

### Results and discussion

170 Also in a coupled fashion, driven by irrigation data and the estimated overall evapotranspiration fluxes, the modeled root profiles are clearly improvements to the exponential profiles (left column in Figure 8), except for the first 20 days during which the exponential profile seems to be a good approximation. However, this does not result in a convincing improvement in the simulated soil moisture profiles and overall water extraction rates (comparison of the data points with the dashed and dotted lines in the middle column of Figure 8). Note that the results for the exponentially shaped estimates are improved in terms of  
175 soil moisture and water extraction rates compared with the stand-alone simulations (comparison of the dotted curves in figure 8 with those in figure 6). Although the vertical root profile shape of the exponential equivalent does not depend on the soil moisture profile, the bulk root growth rate still depends linearly on the vertically integrated soil moisture field via equation 10 (only in a second step, are the roots redistributed in the exponential equivalent): An off-shape profile initially results in higher vertically integrated soil moisture values, which triggers extra root growth. Hence, from a ‘water balance perspective’  
180 an inefficient (unrealistic) profile shape gets compensated by extra root growth. The total difference in overall root growth between the dynamic and exponential root profile shape is indicated as a percentage in the left column. Hence, these results underline the relevance of including soil moisture depending (bulk) root growth for realistic water balances. This is in contrast with the linear dependency of the overall root growth on the overall biomass growth (independently of soil moisture), which is often assumed in crop and land surface models, and also with the assumption that plants invest in roots at times when the plant  
185 experiences drought (Schymanski et al., 2008).

### 3 Conclusions

Our results confirm that there is a strong, and dominant, influence of soil moisture on root density growth and vertical root extension. We show that root profiles can be predicted rather accurately from information on soil moisture profiles only. If soil moisture driven root growth is coupled to an infiltration model, both root and soil moisture profiles can be obtained fairly well  
190 from the water input and (potential) evapotranspiration fluxes, plus a few constants and simple principles.

We also showed that, in our set-up, the effect of unrealistic root profiles on the water balance components is partly compensated by e.g. spatial diffusion and soil pressure driven water flow redistribution. This means that missing information on the precise root distribution, does not automatically mean that large errors in the water budgets are made. However, in the latter case the correct water budget results from ‘compensating’ errors rather than from correct process mechanism.

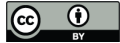

195 This study treats root growth independent of above ground processes, while such a dependence is plausible. However, our results suggest that soil moisture status is a dominant factor influencing root growth. Underestimation of the impact of soil moisture on root growth rates, will result in underestimated plant resilience to drought and environmental changes. And for plants probably counts; preventing water stress by continuous adequate root growth, during periods of favorable soil moisture conditions, is better than to cure it.

200 *Code and data availability.* The data for producing the graphs and results will be made available at <https://doi.org/10.4121/19513957>.

*Author contributions.* Cynthia Maan: conceptualization, experiments, code- and model design, writing - original draft, data curation. Marie-Claire and Bas van de Wiel: funding acquisition, supervision, writing - Review & Editing

*Competing interests.* one author is members of the editorial board of journal HESS. The peer-review process was guided by an independent editor, and the authors have also no other competing interests to declare.

205 *Acknowledgements.* This research was supported by the 4TU.Federation in the Netherlands via the 'High Tech for a Sustainable future' programme.



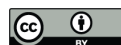

## References

- Adiku, S., Braddock, R., and Rose, C.: Modelling the effect of varying soil water on root growth dynamics of annual crops, *Plant and soil*, 185, 125–135, 1996.
- 210 Barber, S., Mackay, A., Kuchenbuch, R., and Barraclough, P.: Effects of soil temperature and water on maize root growth, *Plant and Soil*, 111, 267–269, 1988.
- Clapp, R. B. and Hornberger, G. M.: Empirical equations for some soil hydraulic properties, *Water resources research*, 14, 601–604, 1978.
- Coifman, R. R., Lafon, S., Lee, A. B., Maggioni, M., Nadler, B., Warner, F., and Zucker, S. W.: Geometric diffusions as a tool for harmonic analysis and structure definition of data: Diffusion maps, *Proceedings of the National Academy of Sciences of the United States of America*, 102, 7426–7431, 2005.
- 215 Engels, C., Mollenkopf, M., and Marschner, H.: Effect of drying and rewetting the topsoil on root growth of maize and rape in different soil depths, *Zeitschrift für Pflanzenernährung und Bodenkunde*, 157, 139–144, 1994.
- Fan, Y., Miguez-Macho, G., Jobbágy, E. G., Jackson, R. B., and Otero-Casal, C.: Hydrologic regulation of plant rooting depth, *Proceedings of the National Academy of Sciences*, 114, 10 572–10 577, 2017.
- 220 Feddes, R. A. and Rijtema, P. E.: Water withdrawal by plant roots, *Journal of Hydrology*, 17, 33–59, 1972.
- Feddes, R. A., Hoff, H., Bruen, M., Dawson, T., De Rosnay, P., Dirmeyer, P., Jackson, R. B., Kabat, P., Kleidon, A., Lilly, A., et al.: Modeling root water uptake in hydrological and climate models, *Bulletin of the American meteorological society*, 82, 2797–2810, 2001.
- Gao, H., Hrachowitz, M., Schymanski, S., Fenicia, F., Sriwongsitanon, N., and Savenije, H.: Climate controls how ecosystems size the root zone storage capacity at catchment scale, *Geophysical Research Letters*, 41, 7916–7923, 2014.
- 225 Gerwitz, A. and Page, E.: An empirical mathematical model to describe plant root systems, *Journal of Applied Ecology*, pp. 773–781, 1974.
- Giard, D. and Bazile, E.: Implementation of a new assimilation scheme for soil and surface variables in a global NWP model, *Monthly weather review*, 128, 997–1015, 2000.
- He, J., Wang, Z., and Fang, J.: Issues and prospects of belowground ecology with special reference to global climate change, *Chinese Science Bulletin*, 49, 1891–1899, 2004.
- 230 Jackson, R., Canadell, J., Ehleringer, J. R., Mooney, H., Sala, O., and Schulze, E. D.: A global analysis of root distributions for terrestrial biomes, *Oecologia*, 108, 389–411, 1996.
- King, J., Gay, A., Sylvester-Bradley, R., Bingham, I., Foulkes, J., Gregory, P., and Robinson, D.: Modelling cereal root systems for water and nitrogen capture: towards an economic optimum, *Annals of botany*, 91, 383–390, 2003.
- Klepper, B., Taylor, H., Huck, M., and Fiscus, E.: Water Relations and Growth of Cotton in Drying Soil 1, *Agronomy Journal*, 65, 307–310, 235 1973.
- Kroes, J., Van Dam, J., Groenendijk, P., Hendriks, R., and Jacobs, C.: SWAP version 3.2. Theory description and user manual, Tech. rep., Alterra, 2009.
- Ristova, D. and Barbez, E.: *Root Development: Methods and Protocols*, Springer, 2018.
- Schymanski, S. J., Sivapalan, M., Roderick, M. L., Beringer, J., and Hutley, L. B.: An optimality-based model of the coupled soil moisture and root dynamics, *Hydrology and earth system sciences*, 12, 913–932, 2008.
- 240 van Dam, J., Metselaar, K., Wipfler, E., Feddes, R., van Meijgaard, E., and van den Hurk, B.: Soil moisture and root water uptake in climate models. Research Programme Climate Changes Spatial Planning, Tech. rep., WUR+ Royal Netherlands Meteorological Institute, 2011.

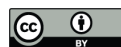

- Warren, J. M., Hanson, P. J., Iversen, C. M., Kumar, J., Walker, A. P., and Wullschleger, S. D.: Root structural and functional dynamics in terrestrial biosphere models—evaluation and recommendations, *New Phytologist*, 205, 59–78, 2015.
- 245 Wasaya, A., Zhang, X., Fang, Q., and Yan, Z.: Root phenotyping for drought tolerance: a review, *Agronomy*, 8, 241, 2018.
- Zhang, J., Wang, J., Chen, J., Song, H., Li, S., Zhao, Y., Tao, J., and Liu, J.: Soil Moisture Determines Horizontal and Vertical Root Extension in the Perennial Grass *Lolium perenne* L. Growing in Karst Soil, *Frontiers in plant science*, 10, 629, 2019.

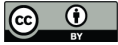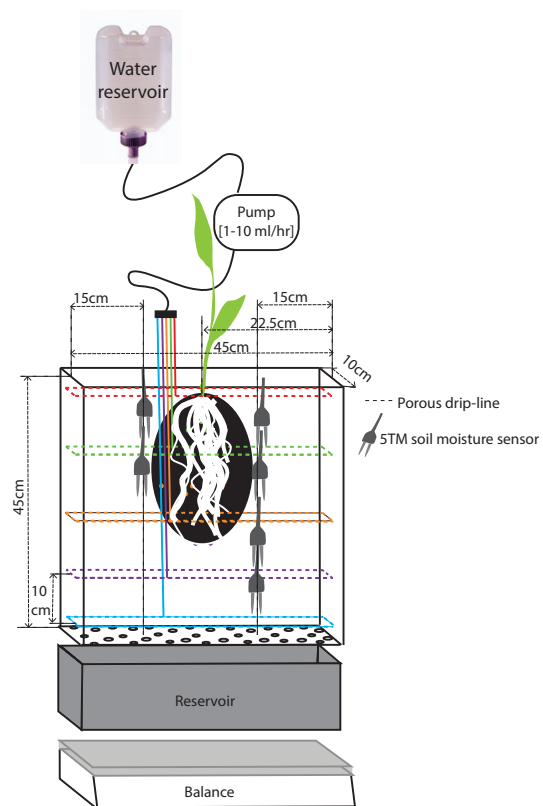

**Figure 1.** Schematic representation of the experimental setup inside a rhizobox.

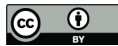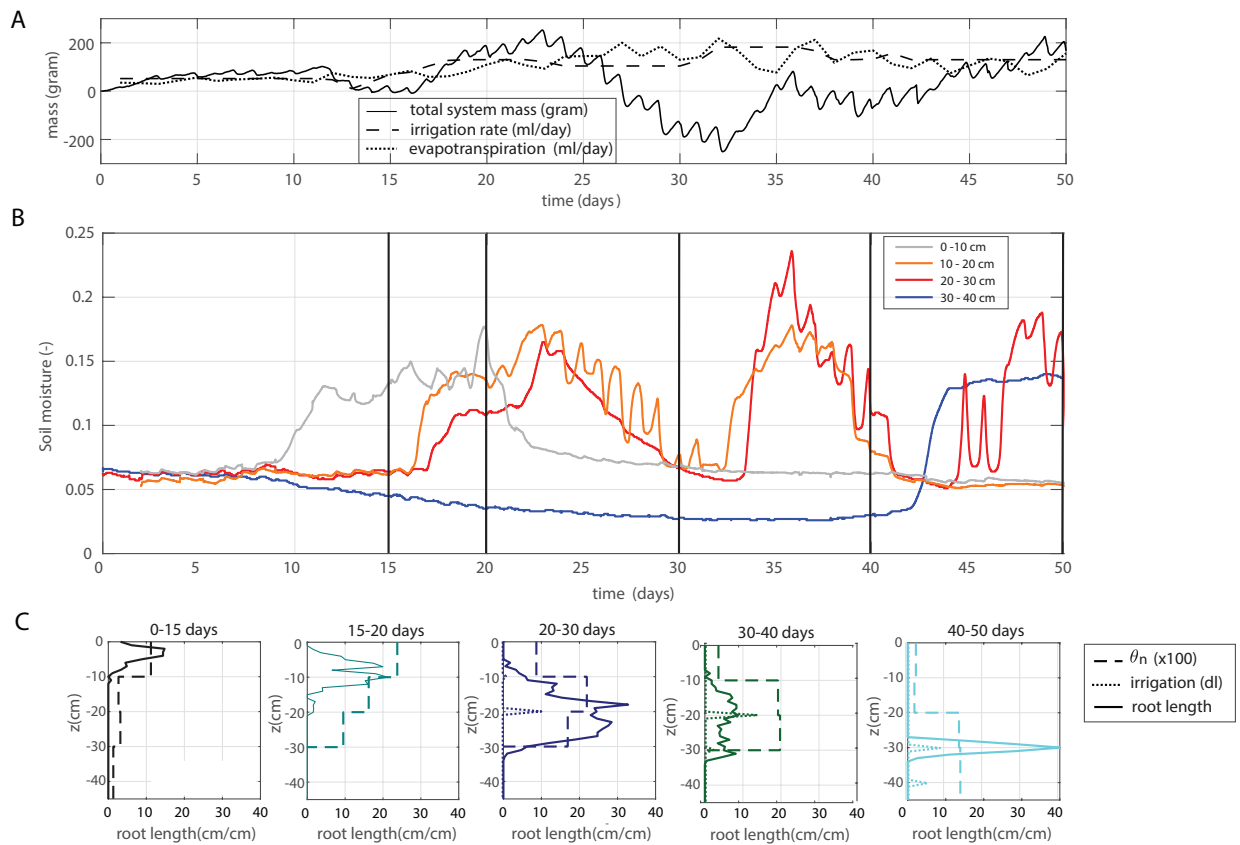

**Figure 2.** A: time series of the overall system mass, irrigation rate and evapotranspiration. B: time-series of the soil moisture within four different depth intervals. C: root growth (solid lines) profiles within succeeding periods, time-averaged soil moisture profiles (dashed lines) and total applied irrigation volume (dotted lines). Root development is most pronounced in the intervals with largest soil moisture.

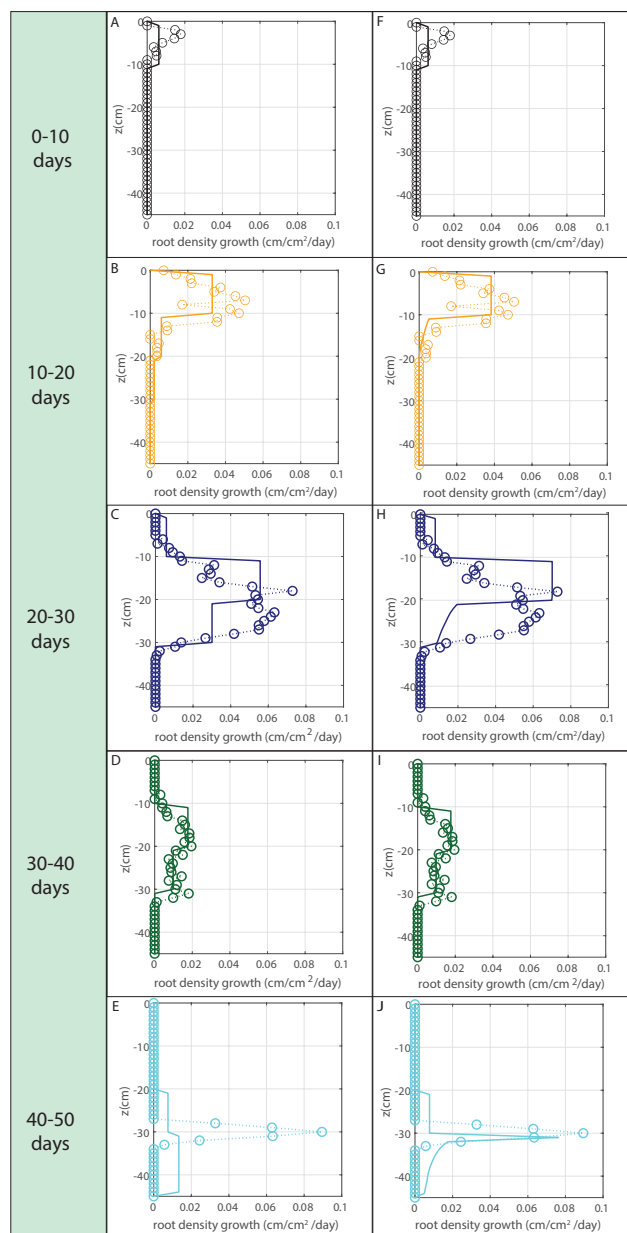

**Figure 3.** Vertical profiles of averaged root growth rates within succeeding periods as observed (circles) and as diagnostically calculated by equation 1 (‘roots follow moisture principle’, solid lines), using the measured bulk root growth and soil moisture profiles. Panels F-J show calculations with the extra requirement that root extension growth needs a local minimum soil moisture (threshold) at the root tip:  $\theta_n > 0.075$ . For both simulations  $u_1$  was taken as  $5\text{cm/day}$ .

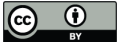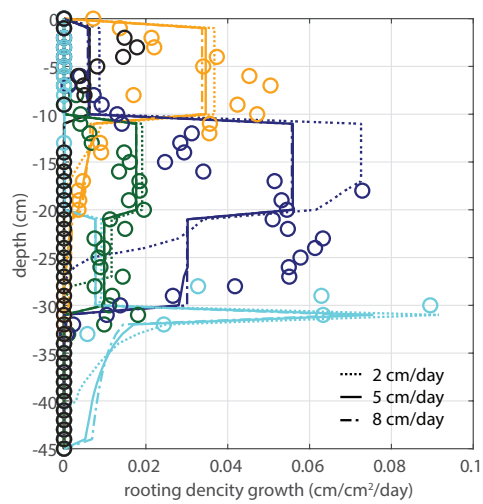

**Figure 4.** Sensitivity of root growth profiles to different values of the extension rate  $u_1$ .

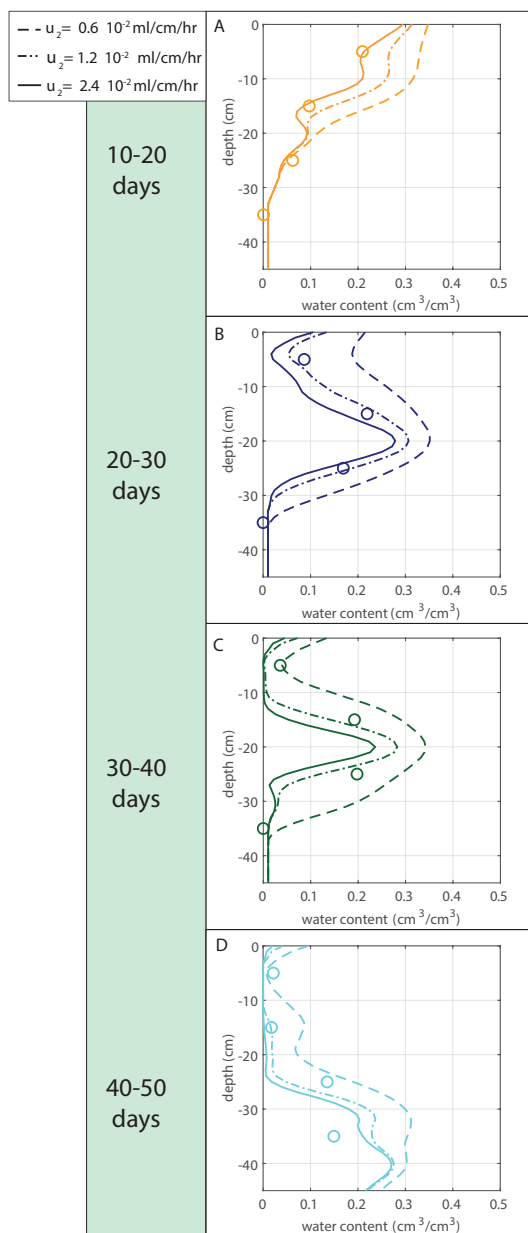

Figure 5. Sensitivity analysis for  $u_2$ .

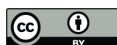

- observed root profiles (left column) and soil moisture measurements (middle column)
- simulations driven by measured root profiles
- - - simulations with modeled root profiles (based on measured water content)
- ⋯⋯ simulations with exponential shaped root profiles

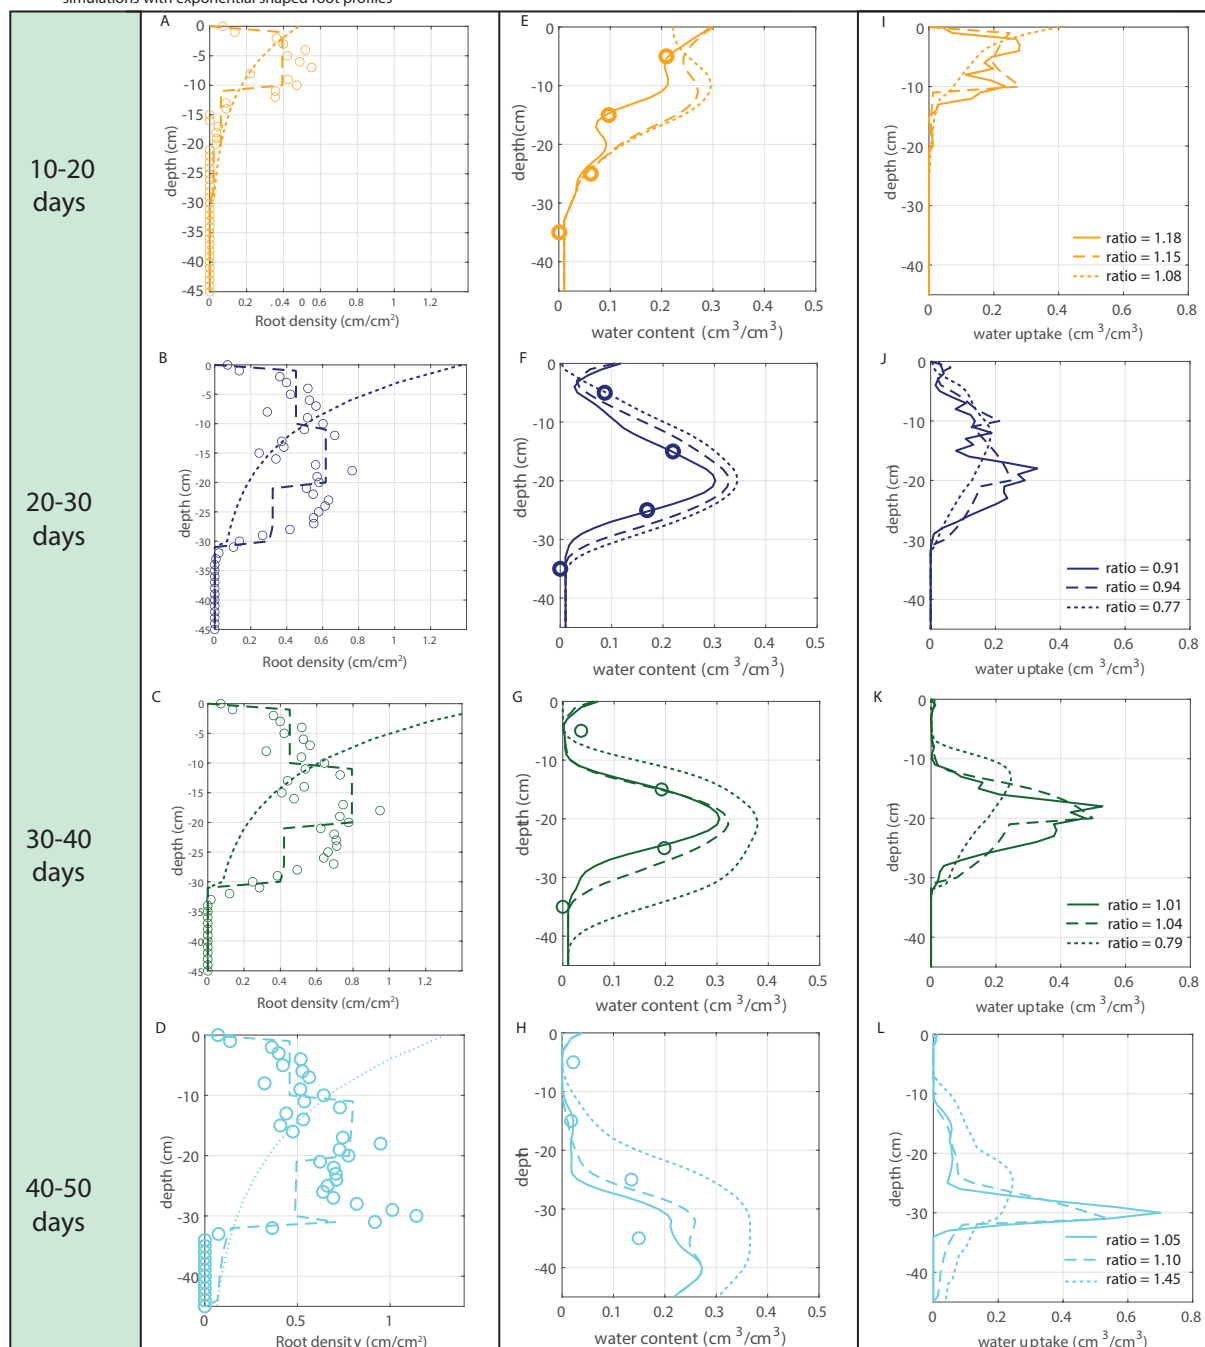

**Figure 6.** Offline simulations of time averaged soil moisture (middle column) and water uptake (right column) for the measured root profiles at the start of each period, for the calculated root profiles, and for exponential equivalents. The *ratio* values in panels I-L indicate the ratio's between the modeled and measured bulk (i.e. vertically integrated) water uptake rates.



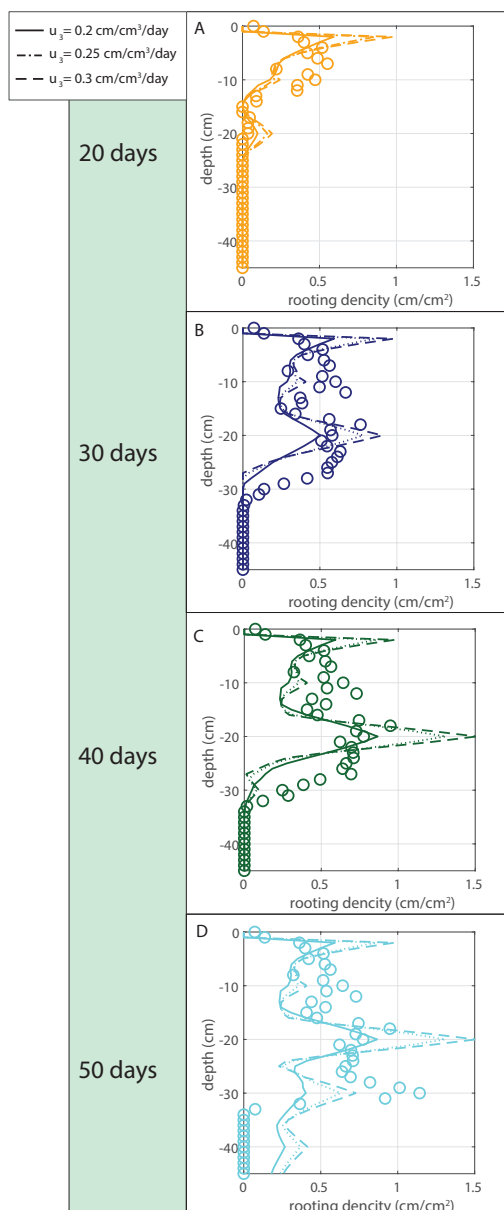

Figure 7. Sensitivity analysis for  $u_3$ .



○ root profiles and soil moisture measurements  
 - - - simulations with modeled root profiles  
 ····· simulations with exponential shaped root profiles

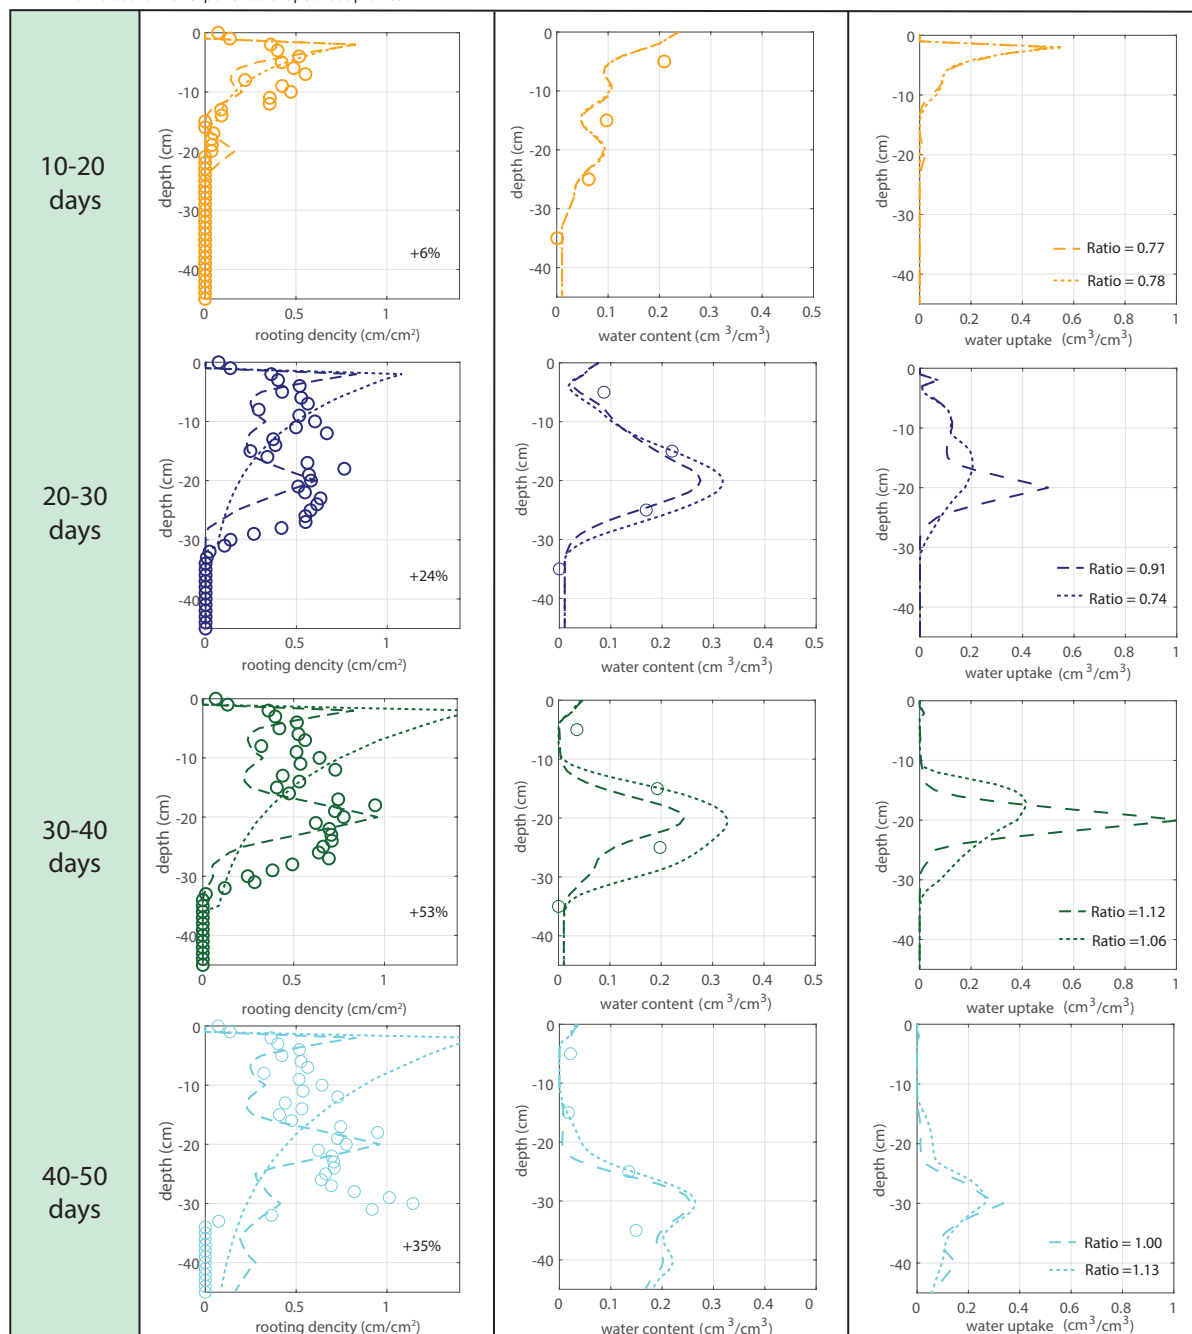

**Figure 8.** Fully coupled model with irrigation and evaporation as input parameters. Left: Observed (circles), simulated (dashed lines), and exponential (dotted lines) root profiles (at the start of each period). The total difference in overall root growth between the dynamic and exponential root profile shape is indicated as a percentage. Middle: corresponding soil moisture profiles. Right: simulated uptake profiles for simulated and exponentially shaped root profiles.
